# Supplementary material
Source: PubMed Central journal article supplement (PMC3260062)
Supplement: supp_jn.111.144287_nut_144287_SF1.pdf [file supp_jn.111.144287_nut_144287_SF1.pdf]

Online Supplemental Material

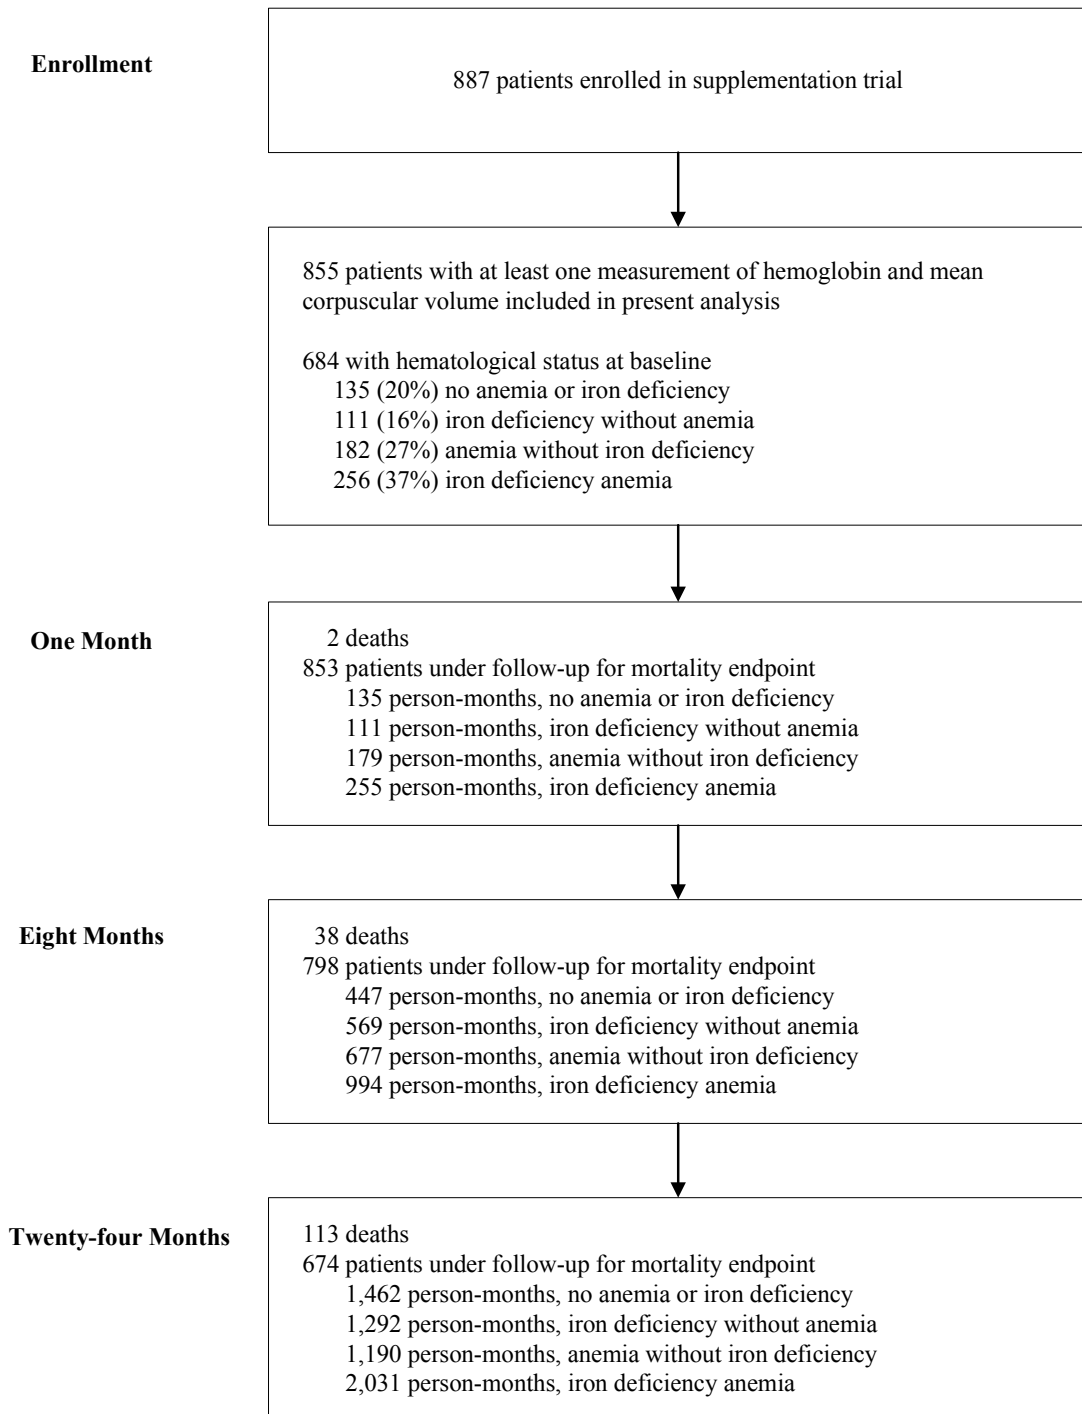

**Supplemental Figure 1.** Summary of follow-up among TB-infected patients in Tanzania. Number of deaths represents cumulative total at each time point after enrollment. Number of patients under follow-up for mortality endpoint represents total number of patients for whom survival status was known at each time point after enrollment. Number of person-mo represents person-time contributed to each hematological group up to each time point.
